# Supplementary material
Source: publisher site journal article supplement (http://www.kjim.org/upload/media/kjim-2020-240-suppl1.pdf)
Supplement: Supplementary file 1 [file kjim-2020-240-suppl1.pdf]

**Supplementary Table 1. Baseline characteristics of patients with biopsy-proven immunoglobulin A nephropathy who underwent immunosuppressive therapy (at the time of kidney biopsy)**

| Variable                         | Total<br>(n = 127)  | Tertiles of proteinuria reduction after<br>immunosuppressive therapy |                     |                     | p value |
|----------------------------------|---------------------|----------------------------------------------------------------------|---------------------|---------------------|---------|
|                                  |                     | Ter1 (n = 43)                                                        | Ter2 (n = 42)       | Ter3 (n = 42)       |         |
| <b>Demographic data</b>          |                     |                                                                      |                     |                     |         |
| Proteinuria, g/gCr               | 1.8 (1.2–3.3)       | 3.8 (2.0–5.1)                                                        | 1.5 (1.2–1.9)       | 1.6 (0.8–2.3)       | < 0.001 |
| Age at biopsy, yr                | 39.6 ± 11.3         | 38.3 ± 9.9                                                           | 39.7 ± 10.9         | 41.0 ± 12.9         | 0.54    |
| Female sex                       | 79 (62.2)           | 34 (79.1)                                                            | 22 (52.4)           | 23 (54.8)           | 0.019   |
| BMI, kg/m <sup>2</sup>           | 23.4 (21.3–26.4)    | 23.3 (21.1–26.9)                                                     | 24.0 (22.4–26.9)    | 23.1 (20.6–25.0)    | 0.16    |
| SBP, mmHg                        | 121.2 ± 14.6        | 123.9 ± 20.5                                                         | 120.9 ± 11.3        | 118.9 ± 9.4         | 0.34    |
| DBP, mmHg                        | 76.4 ± 9.9          | 78.0 ± 11.0                                                          | 77.3 ± 9.2          | 74.1 ± 9.2          | 0.19    |
| <b>Laboratory parameters</b>     |                     |                                                                      |                     |                     |         |
| BUN, mg/dL                       | 15.7 (13.0–18.5)    | 13.9 (12.4–17.3)                                                     | 16.5 (13.0–19.8)    | 16.7 (14.9–19.1)    | 0.043   |
| Creatinine, mg/dL                | 1.0 (0.8–1.3)       | 0.9 (0.6–1.2)                                                        | 1.1 (0.8–1.4)       | 1.1 (0.9–1.3)       | 0.029   |
| eGFR, mL/min/1.73 m <sup>2</sup> | 79.3 (61.2–103.3)   | 85.2 (66.3–109.7)                                                    | 73.3 (58.2–99.3)    | 76.0 (64.4–93.8)    | 0.18    |
| Hemoglobin, g/dL                 | 12.9 ± 1.8          | 12.9 ± 1.6                                                           | 13.2 ± 1.9          | 12.6 ± 1.8          | 0.28    |
| Calcium, mg/dL                   | 8.9 (8.6–9.3)       | 8.8 (8.5–9.1)                                                        | 9.1 (8.6–9.3)       | 9.0 (8.7–9.3)       | 0.052   |
| Inorganic phosphorus, mg/dL      | 3.7 ± 0.6           | 3.7 ± 0.5                                                            | 3.6 ± 0.6           | 3.8 ± 0.6           | 0.31    |
| Uric acid, mg/dL                 | 5.9 (4.7–6.9)       | 5.3 (4.4–6.7)                                                        | 6.1 (5.1–7.1)       | 6.4 (5.0–7.0)       | 0.098   |
| Total protein, g/dL              | 6.4 (6.1–6.9)       | 6.3 (5.7–6.8)                                                        | 6.6 (6.2–7.0)       | 6.5 (6.1–7.0)       | 0.084   |
| Albumin, g/dL                    | 3.8 (3.5–4.1)       | 3.6 (3.2–4.0)                                                        | 3.9 (3.7–4.2)       | 3.8 (3.6–4.2)       | 0.002   |
| Total cholesterol, mg/dL         | 201.0 (174.0–235.0) | 221.0 (201.0–270.0)                                                  | 192.5 (178.0–214.0) | 186.0 (164.0–223.0) | < 0.001 |
| HDL-C, mg/dL                     | 48.5 (40.0–61.0)    | 51.5 (41.5–61.5)                                                     | 41.0 (40.0–57.0)    | 53.0 (41.0–64.0)    | 0.38    |
| LDL-C, mg/dL                     | 121.0 (106.0–150.0) | 126.0 (116.0–181.0)                                                  | 110.5 (93.0–142.0)  | 125.0 (110.0–135.0) | 0.11    |
| Triglyceride, mg/dL              | 140.0 (93.0–219.0)  | 148.5 (108.0–220.0)                                                  | 186.0 (115.0–244.0) | 118.0 (76.0–148.0)  | 0.053   |
| Na, mmol/L                       | 140.7 ± 1.9         | 140.1 ± 2.1                                                          | 141.0 ± 2.0         | 140.8 ± 1.6         | 0.088   |
| K, mmol/L                        | 4.3 ± 0.4           | 4.3 ± 0.4                                                            | 4.3 ± 0.4           | 4.3 ± 0.4           | 0.57    |
| Cl, mmol/L                       | 104.3 ± 2.3         | 104.4 ± 2.3                                                          | 104.1 ± 2.2         | 104.5 ± 2.2         | 0.77    |
| tCO <sub>2</sub> , mmol/L        | 25.7 ± 2.3          | 25.6 ± 2.3                                                           | 25.8 ± 2.3          | 25.7 ± 2.4          | 0.95    |
| <b>Comorbidities</b>             |                     |                                                                      |                     |                     |         |
| HTN                              | 104 (81.9)          | 35 (81.4)                                                            | 33 (78.6)           | 36 (85.7)           | 0.69    |
| DM                               | 14 (11.0)           | 3 (7.0)                                                              | 5 (11.9)            | 6 (14.3)            | 0.53    |
| CVD                              | 4 (3.1)             | 0                                                                    | 2 (4.8)             | 2 (4.8)             | 0.39    |
| CHD                              | 4 (3.1)             | 2 (4.7)                                                              | 0                   | 2 (4.8)             | 0.54    |
| <b>Medication history</b>        |                     |                                                                      |                     |                     |         |
| ACE inhibitor                    | 5 (3.9)             | 0                                                                    | 2 (4.8)             | 3 (7.1)             | 0.23    |
| ARB                              | 78 (61.4)           | 20 (46.5)                                                            | 29 (69.0)           | 29 (69.0)           | 0.047   |
| Spironolactone                   | 6 (4.7)             | 3 (7.0)                                                              | 1 (2.4)             | 2 (4.8)             | 0.87    |
| Statin                           | 30 (23.6)           | 11 (25.6)                                                            | 7 (16.7)            | 12 (28.6)           | 0.41    |

Values are presented as median (interquartile range), mean ± standard deviation, or number (%).

Ter1, first tertile; Ter2, second tertile; Ter3, third tertile; BMI, body mass index; SBP, systolic blood pressure; DBP, diastolic blood pressure; BUN, blood urea nitrogen; eGFR, estimated glomerular filtration rate; HDL-C, high-density lipoprotein cholesterol; LDL-C, low-density lipoprotein cholesterol; HTN, hypertension; DM, diabetes mellitus; CVD, cerebrovascular disease; CHD, coronary heart disease; ACE, angiotensin converting enzyme; ARB, angiotensin receptor blocker.
